# Supplementary material for: A Deep Learning System for Diagnosis of Rheumatoid Arthritis on Digital Hand Photographs
Source: Research Square preprint supplement (doi:10.21203/rs.3.rs-7564397/v1), 2025-09-23
Supplement: Supplementary file 1 [file 3540c7fd7834e41040d82cd7.docx]

| **Diagnosis** | **Count** | **Percentage** |
| --- | --- | --- |
| Normal findings or transient conditions | 36 | 42.86 |
| Osteoarthritis | 25 | 29.76 |
| Fibromyalgia | 10 | 11.90 |
| Tendonitis | 3 | 3.57 |
| de Quervain tenosynovitis | 2 | 2.38 |
| Hyperuricemia | 2 | 2.38 |
| Iron deficiency anemia | 1 | 1.19 |
| Nontuberculous mycobacteriumosis | 1 | 1.19 |
| Organizing pneumonia | 1 | 1.19 |
| Pneumonia | 1 | 1.19 |
| Psoriasis | 1 | 1.19 |
| Tuberculosis | 1 | 1.19 |
| Total | 84 | 100 |
